# Supplementary material
Source: Research Square preprint supplement (doi:10.21203/rs.3.rs-8411532/v1)
Supplement: Supplementary file 1 [file 8413b0d5678809f3ebab083a.docx]

**
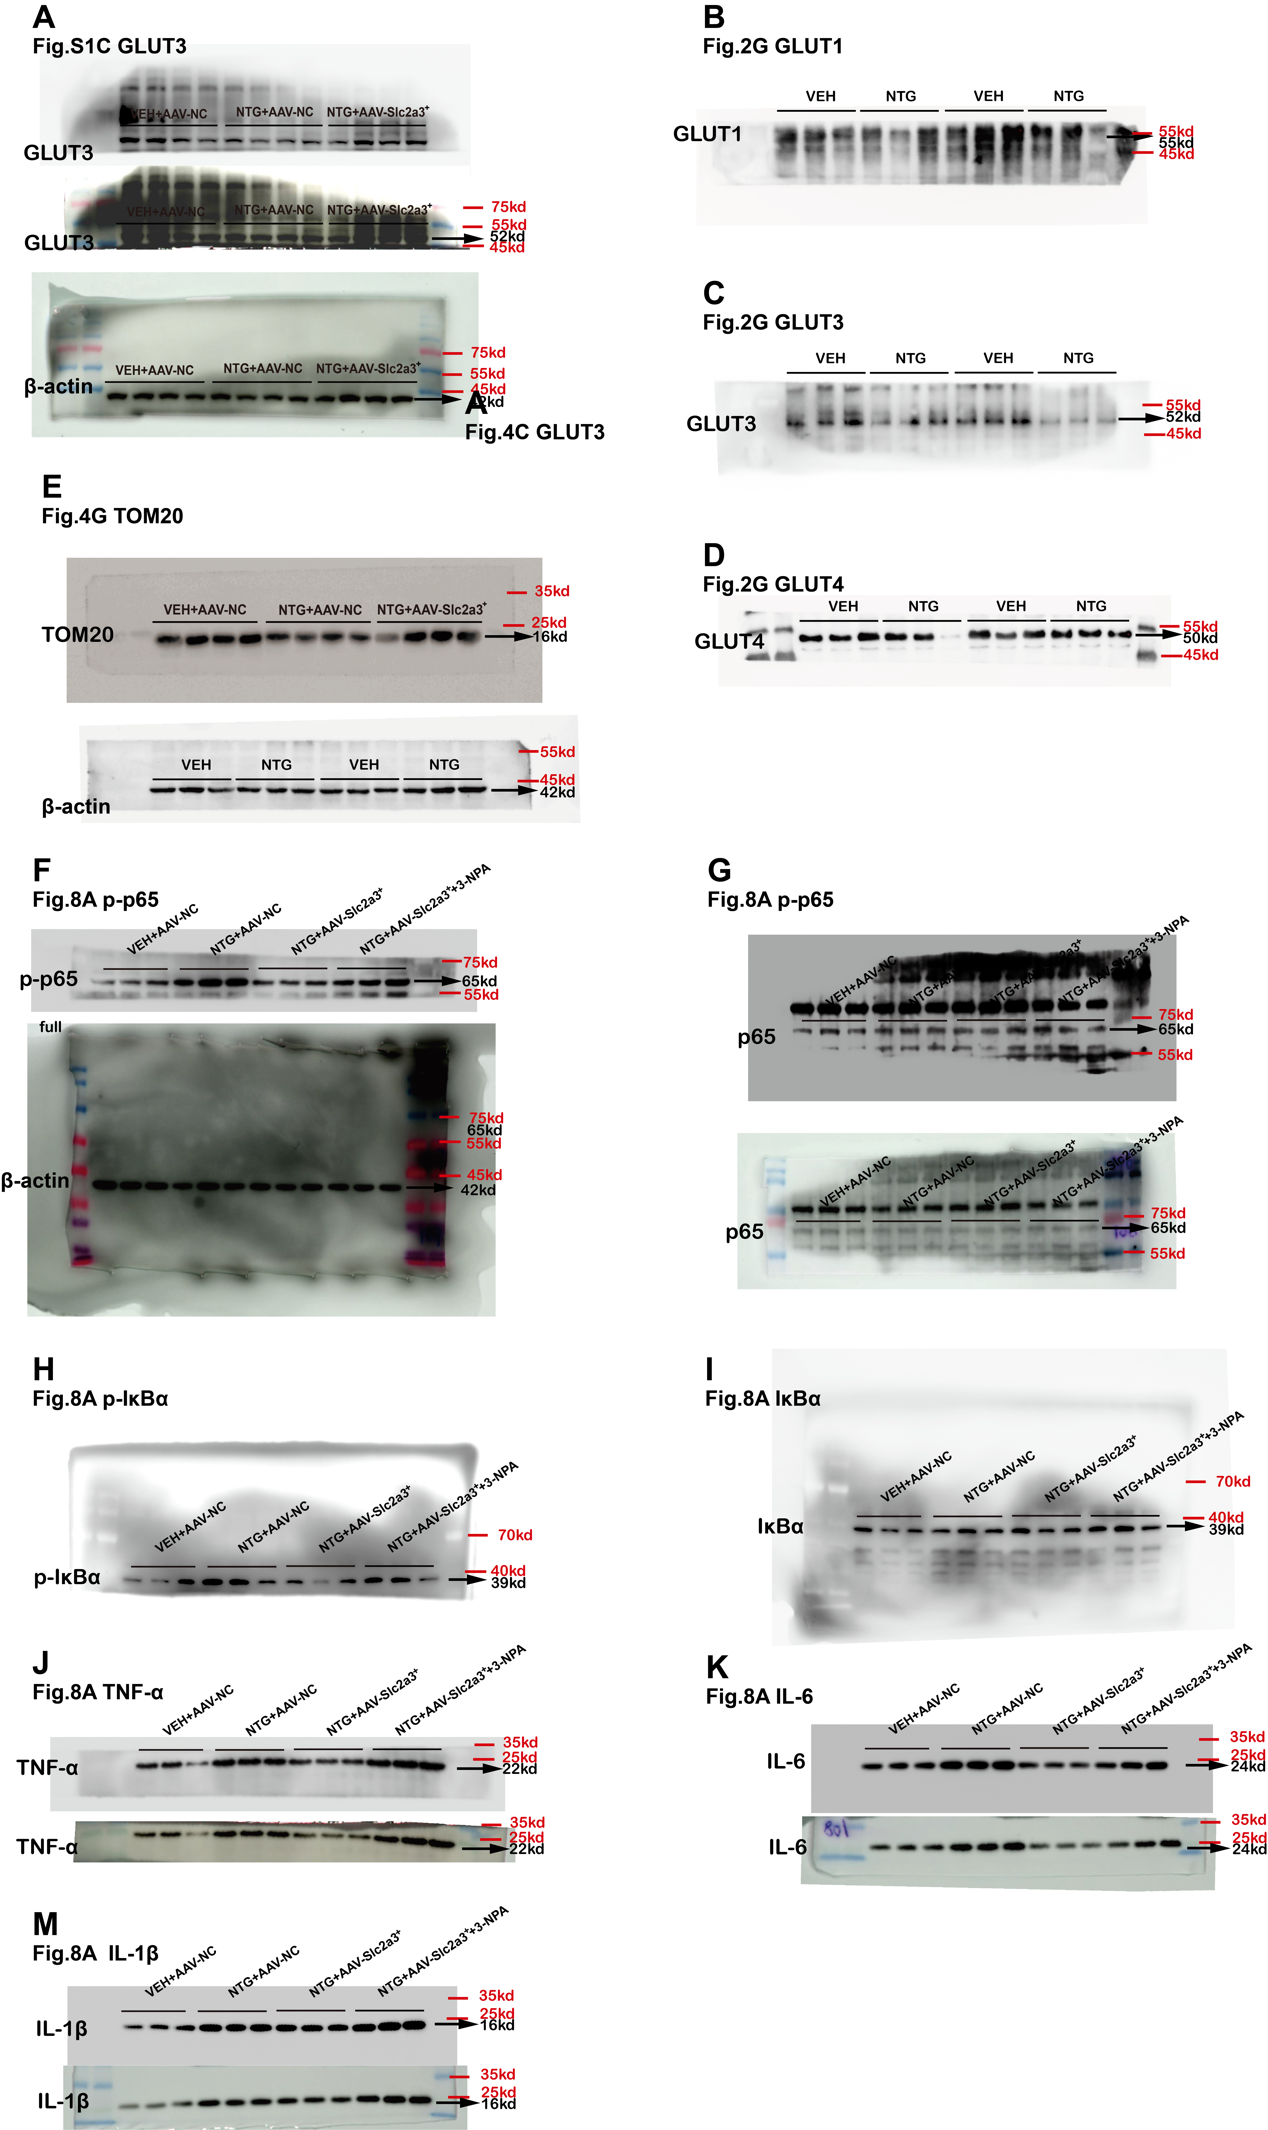
**

**Original WB Data**

**(A)** (corresponding to original Fig.S1C) ：Detects the expression of GLUT3, with β-actin as the internal control. **(B)** (corresponding to original Fig.2G) ：Detects the expression of GLUT1. **(C)** (corresponding to original Fig.2G) ：Detects the expression of GLUT3. **(D)** (corresponding to original Fig.2G) ：Detects the expression of GLUT4. **(E)** (corresponding to original Fig.4G) ：Detects the expression of TOM20, with β-actin as the internal control. **(F)** (corresponding to original Fig.8A) ：Detects the expression of phosphorylated p65 (p-p65), with β-actin as the internal control. **(G)** (corresponding to original Fig.8A) ：Detects the expression of phosphorylated p65 (p-p65) and total p65. **(H)** (corresponding to original Fig.8A) ：Detects the expression of phosphorylated IκBα (p-IκBα). **(I)** (corresponding to original Fig.8A) ：Detects the expression of total IκBα. **(J)** (corresponding to original Fig.8A) ：Detects the expression of TNF-α. **(K)** (corresponding to original Fig.8A) ：Detects the expression of IL-6. **(M)** (corresponding to original Fig.8A) ：Detects the expression of IL-1β.
